# Supplementary material for: A target enrichment probe set for resolving the flagellate land plant tree of life
Source: PubMed Central journal article supplement — Appl Plant Sci. 2021 Jan 24;9(1):e11406. doi: 10.1002/aps3.11406 (PMC7845764; doi:10.1002/aps3.11406), 2021-01-24

**APPENDIX S7.** Phylogram from a maximum likelihood analysis of the supermatrix made by concatenating the alignments from the GoFlag 408 probe regions (i.e., exons) for the samples with at least 45 loci. The tree was rooted between the bryophytes and vascular plants.

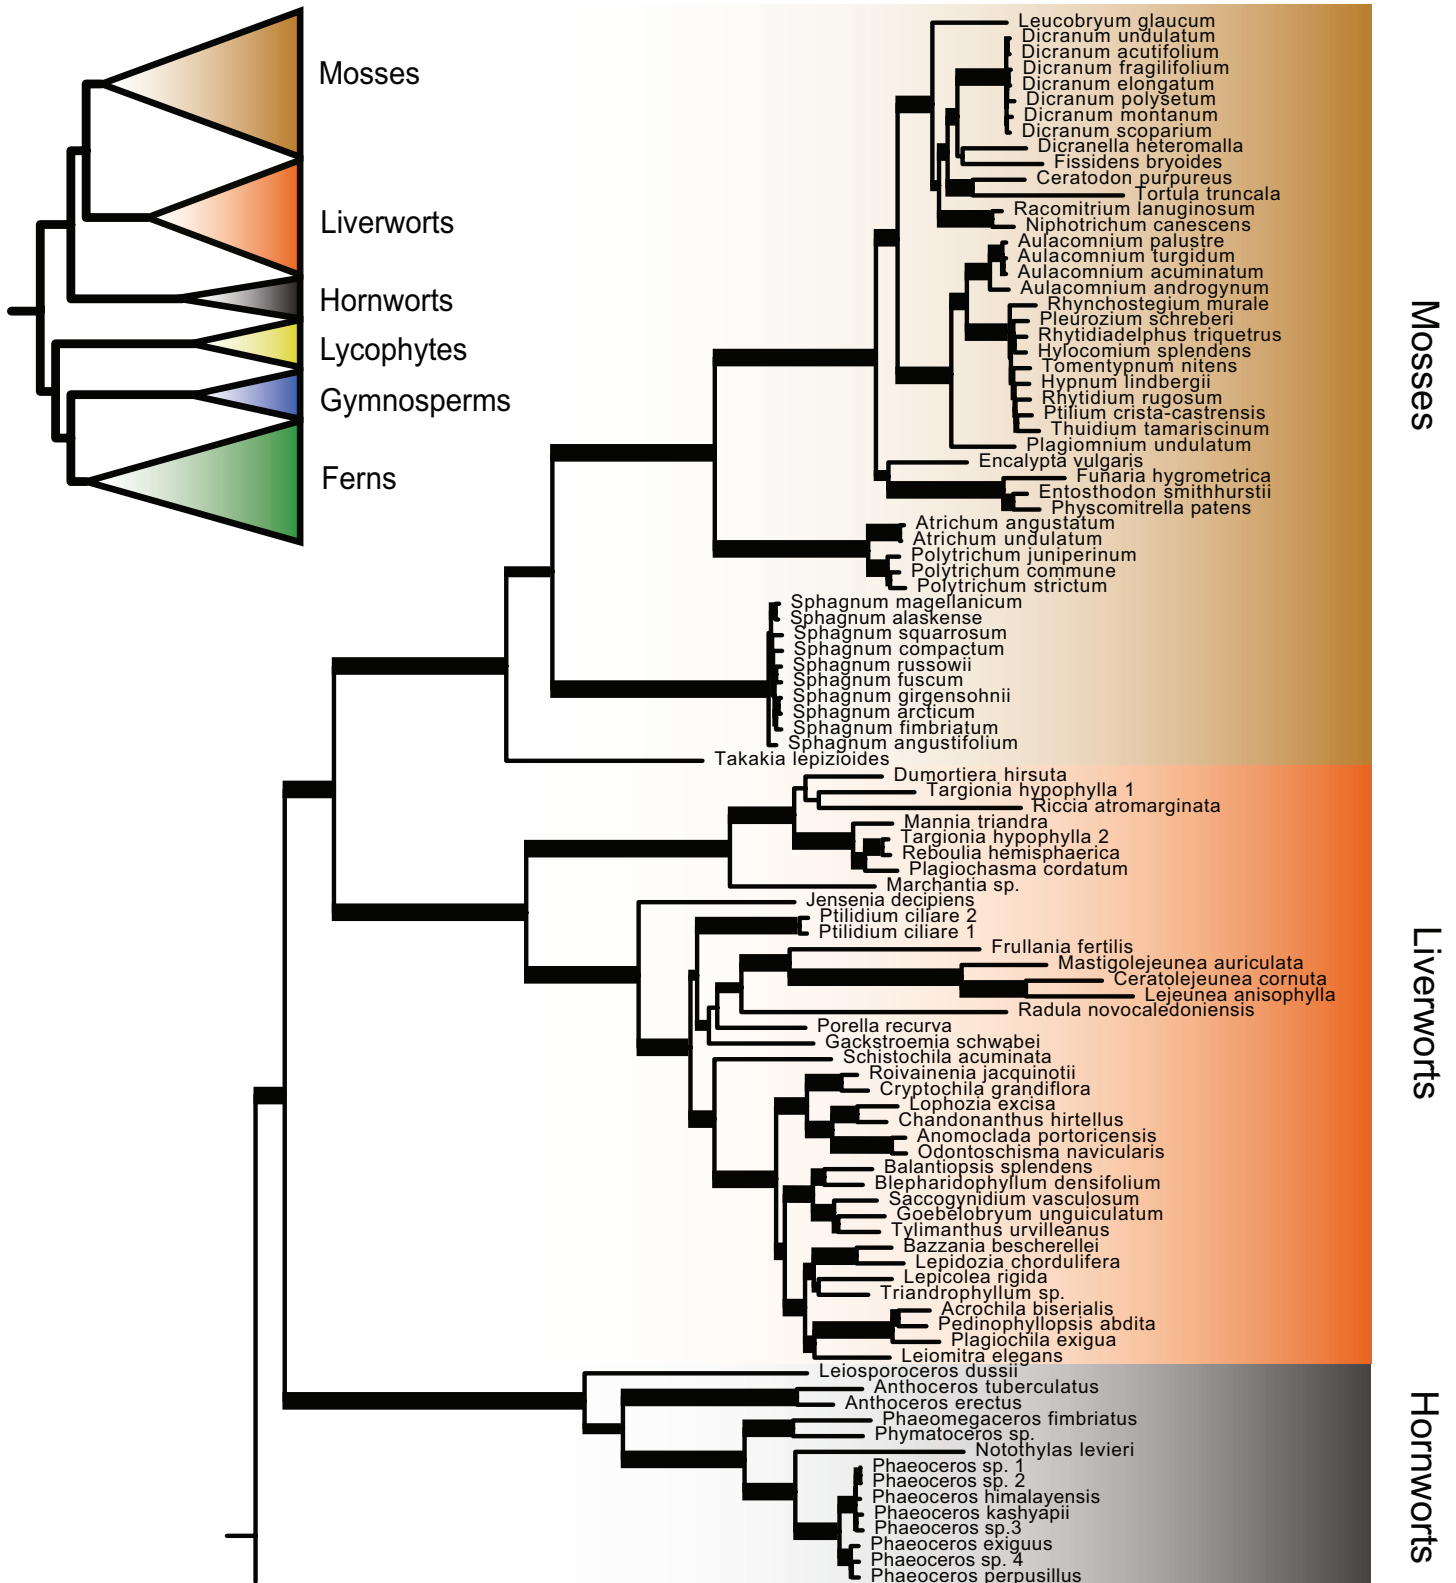

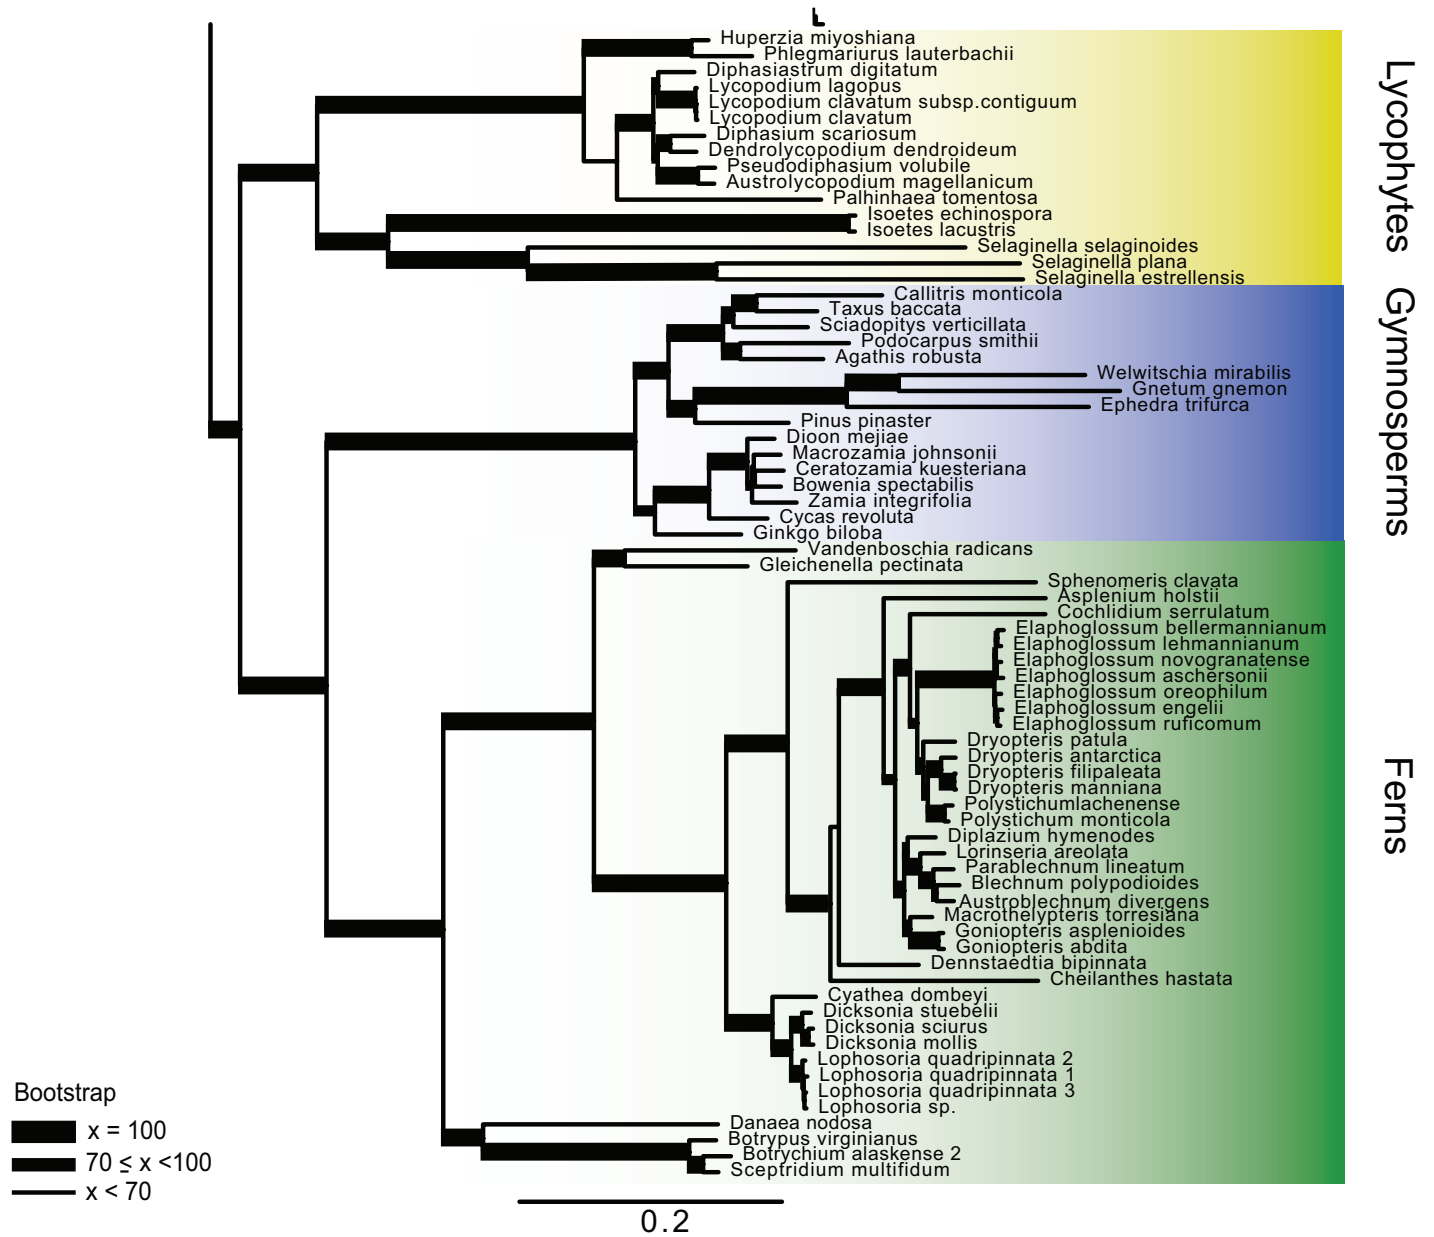

Supplement: APS3-9-e11406-s007.pdf [file APS3-9-e11406-s007.pdf]
